# Supplementary material for: Interplay between NS3 protease and human La protein regulates translation-replication switch of Hepatitis C virus
Source: PubMed Central journal article supplement — Sci Rep. 2011 Jun 14;1:1. doi: 10.1038/srep00001 (PMC3210691; doi:10.1038/srep00001), 2011-06-14
Supplement: srep00001-s1.pdf [file srep00001-s1.pdf]

Interplay between NS3 protease and human La protein---- by Ray and Das **Supplementary fig 1**

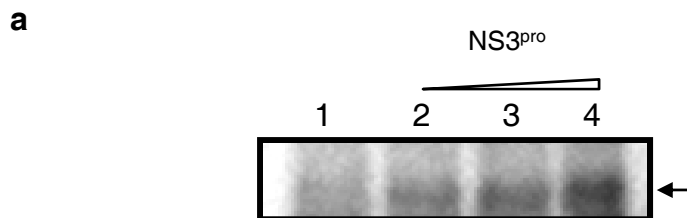

**UV crosslinking assay:**  $\alpha$ [<sup>32</sup>P]UTP labeled HCV IRES RNA was UV-crosslinked to increasing concentrations (0.1, 0.2 and 0.4 $\mu$ M) NS3<sup>pro</sup> in RNA binding buffer containing 140mM KCl. The protein-nucleotide complex was resolved in 15% SDS-PAGE followed by phosphor imaging analysis. The position of the NS3<sup>pro</sup> protein is indicated by an arrow.

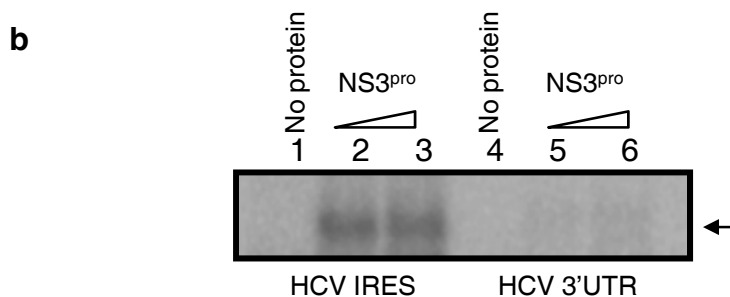

**UV crosslinking assay:**  $\alpha$ [<sup>32</sup>P]UTP labeled HCV IRES RNA (lanes 1-3) and HCV 3'UTR RNA (lanes 4-6) were UV-crosslinked to increasing concentration (0.1 and 0.2 $\mu$ M) of NS3<sup>pro</sup>. The protein-nucleotide complex was resolved in 15% SDS-PAGE followed by phosphor imaging analysis. The position of the NS3<sup>pro</sup> protein is indicated by an arrow.

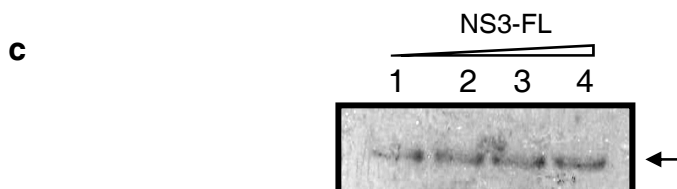

**UV crosslinking assay:**  $\alpha$ [<sup>32</sup>P]UTP labeled HCV IRES was UV crosslinked to increasing concentrations (0.1, 0.2, 0.4 and 0.8 $\mu$ M) of recombinant full length NS3 protein (lane1-4). The position of the full length NS3 protein is indicated by an arrow.

Interplay between NS3 protease and human La protein---- by Ray and Das **Supplementary fig 2**

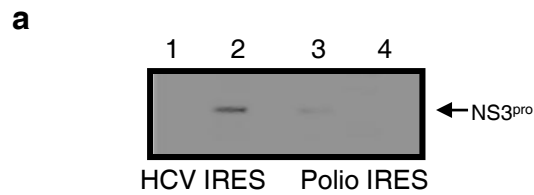

**UV crosslinking assay:**  $\alpha$ [<sup>32</sup>P]UTP labeled HCV IRES (lanes 1-2) and Polio IRES RNA (lanes 3-4) were UV-crosslinked to NS3<sup>pro</sup> protein. The protein-nucleotide complex was resolved in 15% SDS-PAGE followed by phosphor imaging analysis. The position of NS3<sup>pro</sup> protein is indicated by an arrow.

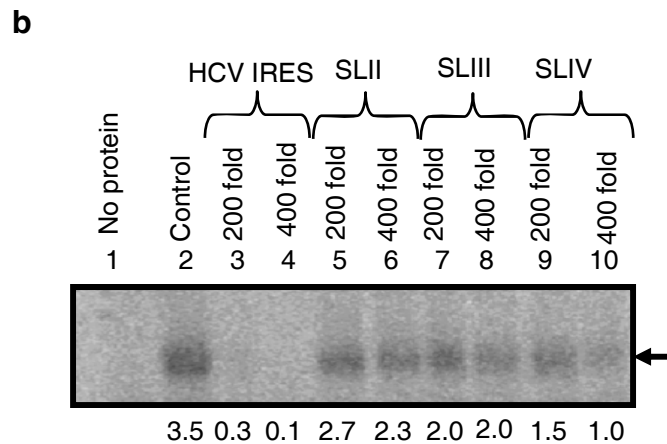

**Competition UV crosslinking assay:**  $\alpha$ [<sup>32</sup>P]UTP labeled HCV IRES was UV-crosslinked to NS3<sup>pro</sup>. Unlabelled cold HCV IRES (lanes 3-4), SLII (lanes 5-6), SLIII (lanes 7-8) and SLIV RNA (lanes 9-10) were used for competition. Lane 2 is a control without cold RNA competition. The protein-nucleotide complex was resolved in 15% SDS-PAGE followed by phosphor imaging analysis. The position of NS3<sup>pro</sup> protein is indicated by an arrow.



**a**

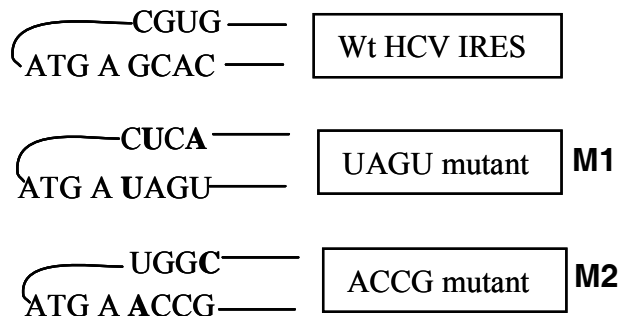

Schematic representation of wild type and the two mutant SLIV (UAGU and ACCG mutants) constructs showing the positions of the mutations.

**b**

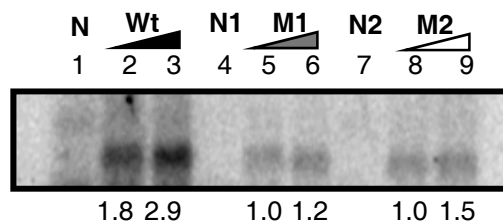

**UV crosslinking assay:**  $\alpha$ [<sup>32</sup>P] UTP labeled HCV wild type (lanes 1-3), or M1 (lanes 4-6), and M2 IRES (lanes 7-9) RNAs were UV-crosslinked to increasing concentrations of NS3<sup>pro</sup>. The protein-nucleotide complex was resolved in 15% SDS-PAGE followed by phosphor imaging analysis. The position of NS3<sup>pro</sup> protein is indicated by an arrow. N, N1 and N2 represents no protein control.

Interplay between NS3 protease and human La protein---- by Ray and Das Supplementary fig 5

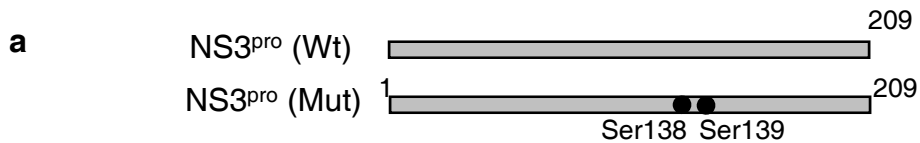

**Alignment of nucleotide sequence of wild type NS3 and mutant NS3 using NCBI BLAST**

Score = 815 bits (441), Expect = 0.0  
 Identities = 445/447 (99%), Gaps = 0/447 (0%)  
 Strand=Plus/Minus

Query 346  
 TGCACCTGCGGCAGCTCGGACCTTTACCTGGTCACGAGACATGCTGATGTCATCCCGGTG 405

|||||  
 Sbjct 207  
 TGCACCTGCGGCAGCTCGGACCTTTACCTGGTCACGAGACATGCTGATGTCATCCCGGTG 148

Query 406  
 CGCCGGCGGGGCGACACTAGGGGGAGCTTGCTCTCCCCTAGACCCATCTCCTACTTGAAG 465

|||||  
 Sbjct 147  
 CGCCGGCGGGGCGACACTAGGGGGAGCTTGCTCTCCCCTAGACCCATCTCCTACTTGAAG 88

Query 466  
 GGCTCTTCGGTGGTCCATTGCTCTGCCCTCGGGGCACGTTGTGGGCATCTTCCGGGCT 525

◆ ◆  
 |||  
 Sbjct 87  
 GGCTCTTCGGTGGTCCATTGCTCTGCCCTCGGGGCACGTTGTGGGCATCTTCCGGGCT 28

◆ ◆  
 Query 526 GCCGTGTGCACCCGGGGGGTTCGCGAAG 552

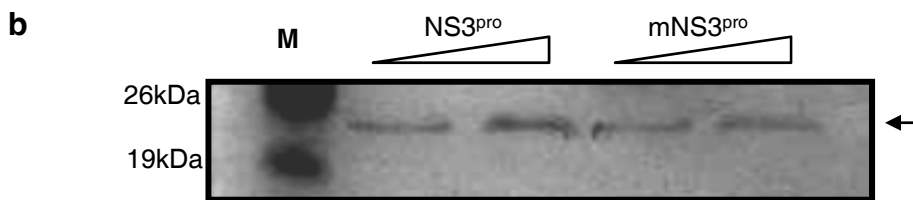

**Silver stained gel:** Purified wild type and mutant NS3<sup>pro</sup> were resolved in 15% SDS-PAGE followed by silver staining. Lane M represents the protein marker.

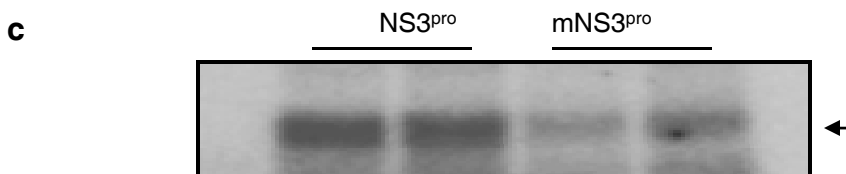

**UV crosslinking assay:**  $\alpha$ [<sup>32</sup>P]UTP labeled HCV IRES RNA was UV-crosslinked to NS3<sup>pro</sup> or mNS3<sup>pro</sup> (as indicated). The protein-nucleotide complex was resolved in 15% SDS-PAGE followed by phosphor imaging analysis. The position of the respective proteins are indicated by arrows.

Interplay between NS3 protease and human La protein---- by Ray and Das **Supplementary fig 6**

**a**

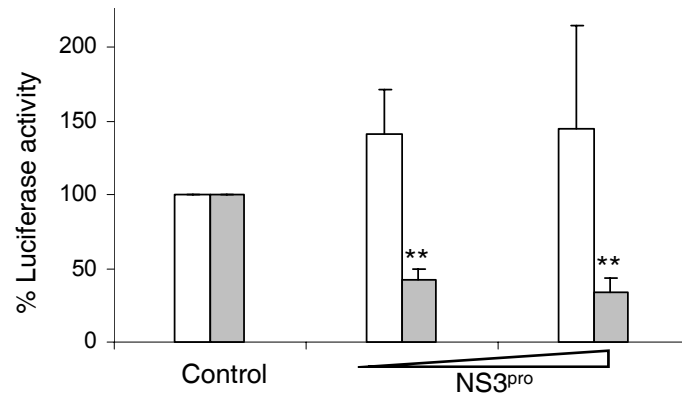

HCV bicistronic construct was transiently cotransfected with increasing concentrations of NS3<sup>pro</sup> mammalian expression construct. DNA concentrations were normalized using the empty vector DNA. 24 hours post transfection, cells were lysed and luciferase assay was performed. Percent luciferase activities corresponding to RLuc (white bar) and Fluc (grey bar) values were plotted against the protein concentrations. Values which significantly differ from control (P value<0.001) are indicated as asterisks.

**b**

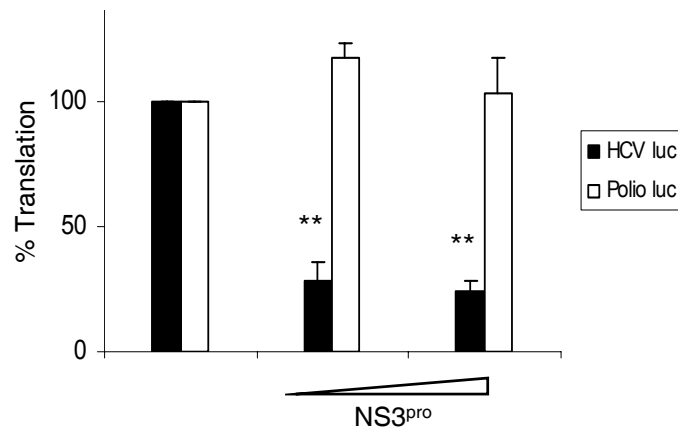

***In vitro translation*** : HCV-IRES luc RNA and Polio-IRES luc RNA were translated *in vitro* in rabbit reticulocyte lysate in presence of increasing concentrations (0.2 and 0.4 $\mu$ M) of NS3<sup>pro</sup> protein. Values which significantly differ from control (P value<0.001) are indicated as asterisks.

**Interplay between NS3 protease and human La protein---- by Ray and Das Supplementary fig 7**

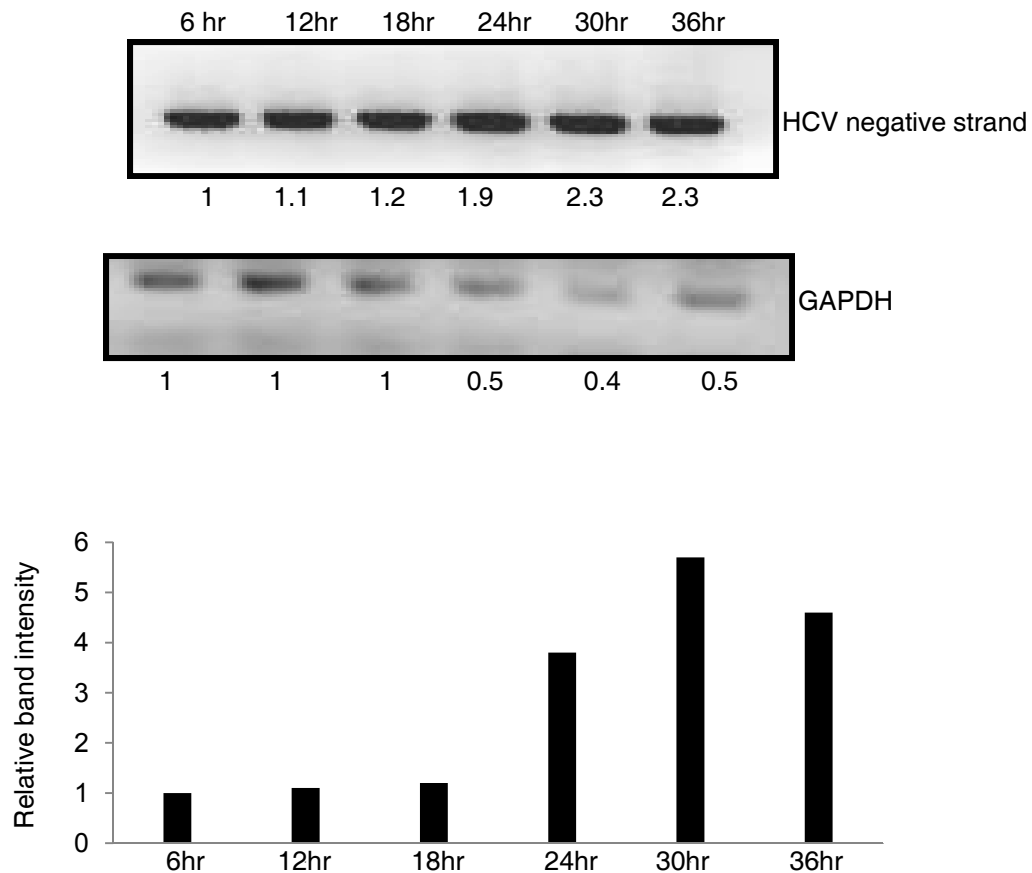

**Semi quantitative RT-PCR:** Huh7 cells were transiently cotransfected with 5 $\mu$ g of pSGR JFH1/Luc RNA and 500ng of vector using Lipofectamine 2000 as transfection reagent. At 6<sup>th</sup>, 12<sup>th</sup>, 18<sup>th</sup>, 24<sup>th</sup>, 30<sup>th</sup> and 36<sup>th</sup> hour of transfection, RNA was isolated and HCV negative strand RNA was detected using semi quantitative RT PCR followed by densitometry of the band intensities. GAPDH was detected as internal control. Band intensities of the HCV negative strand amplification was normalized with that of GAPDH and plotted with time points on X axis and relative band intensity on Y axis

Interplay between NS3 protease and human La protein---- by Ray and Das **Supplementary fig 8**

**La overexpression**

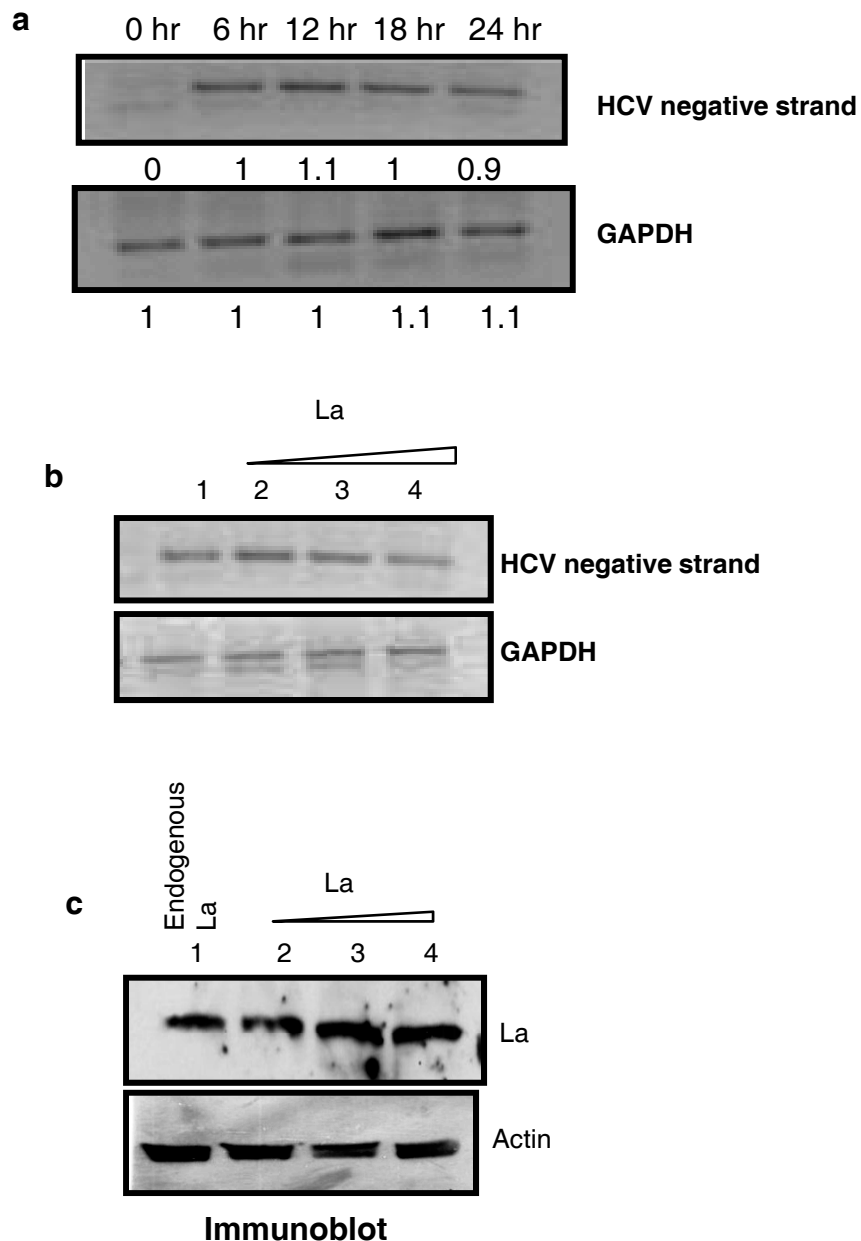

Huh 7 cells were transiently co-transfected with HCV dicistronic replicon (Kato et al 2005) along with La encoding plasmid. RNA was isolated at different time points (as indicated) and reverse transcribed with HCV 5' primer and GAPDH 3' primer using MMLV RT (Promega) for amplification of negative strand of HCV RNA. Resulting cDNA was used for PCR amplification corresponding to HCV IRES. The PCR products were run on 2% agarose gel. GAPDH was used as an internal control (bottom of each panel).

Panel a: effect of La over expression on HCV negative strand synthesis at different time intervals.

Panel b: effect of increasing concentrations of La overexpressions at 18 hours post transfection.

Panel c: Western blot analysis of the above reactions (described in panel b) to show over expression of La protein, actin was used as internal control



Interplay between NS3 protease and human La protein---- by Ray and Das **Supplementary fig 9**

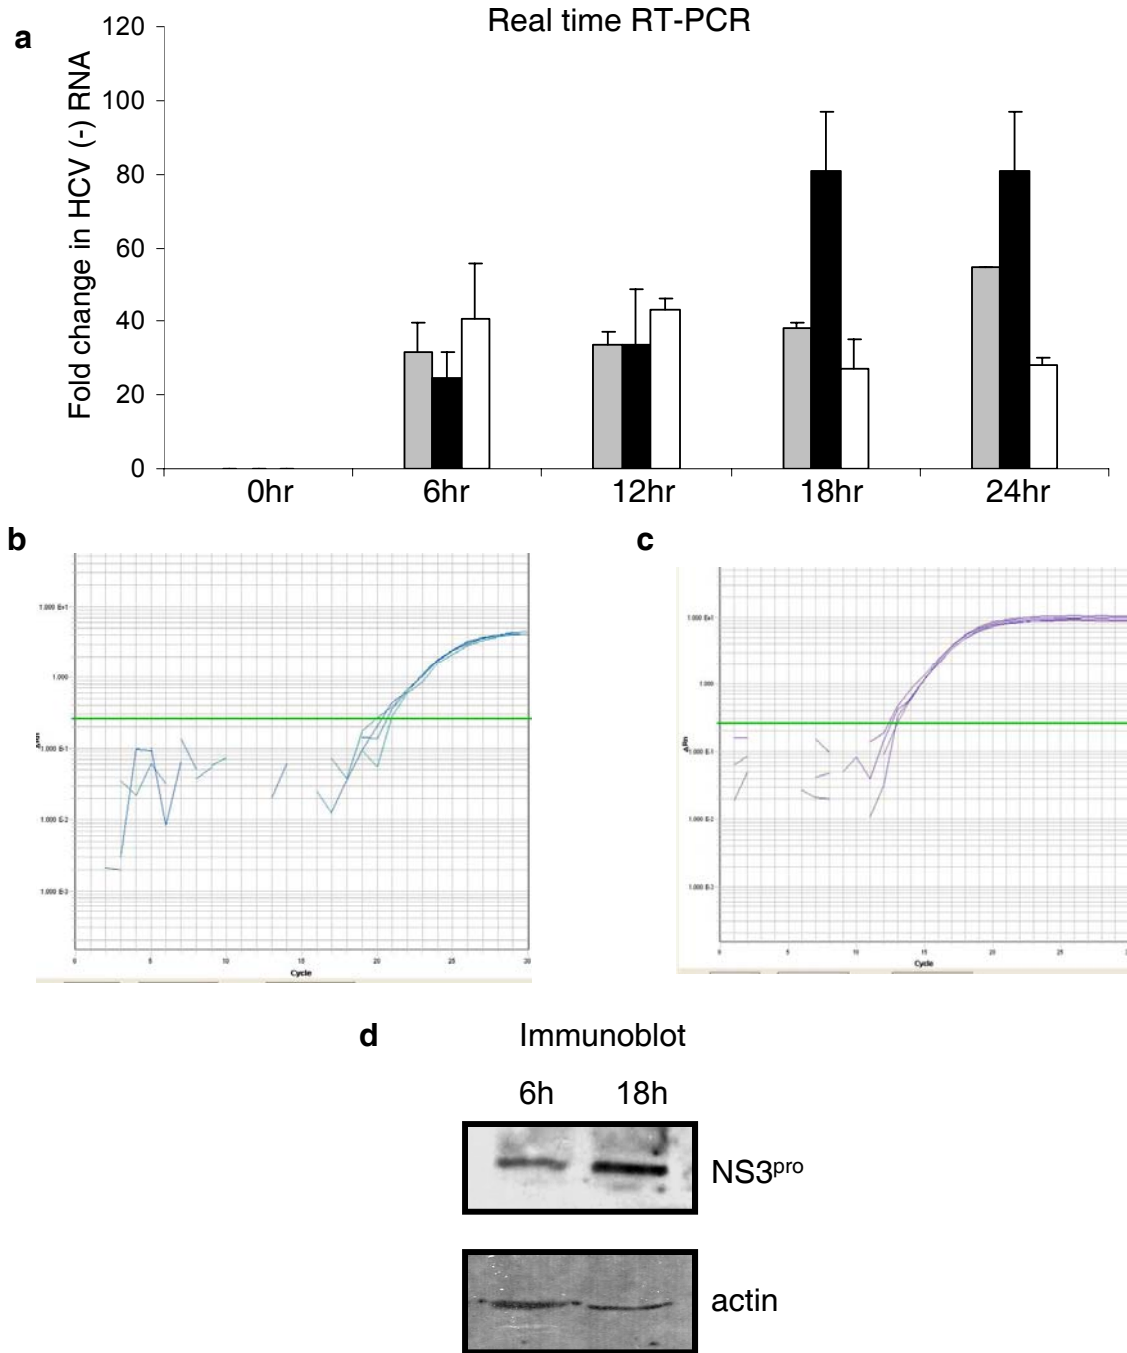

**Real time RT-PCR:** Huh7 cells were transiently cotransfected with 5µg of pSGR JFH1/Luc RNA and construct encoding either NS3 protease (black bar) or core (white bar) or vector alone (grey bar) using Lipofectamine 2000 as transfection reagent. At 0, 6<sup>th</sup>, 12<sup>th</sup>, 18<sup>th</sup> and 24<sup>th</sup> hour post transfection, RNA was isolated and HCV negative strand RNA was detected using real time RT PCR. GAPDH was used as an internal control (panel a). The data was analyzed by ABI-Prism's Real time PCR machine. Fold change in RNA level was calculated taking 0<sup>th</sup> hour time point as control.

Panel b and c: Representative amplification plots for HCV IRES and GAPDH respectively as obtained in the real time RT-PCR mentioned above.

Panel d: Western blot analysis to show over expression of NS3<sup>pro</sup> in the transfected cells.

**Interplay between NS3 protease and human La protein---- by Ray and Das Supplementary fig 10**

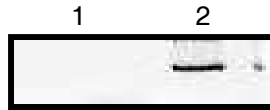

**PCR:** Possibility of DNA contamination was checked by PCR of the in vitro transcribed pSGRlucJFH1 RNA for HCV IRES (Lane 1). Lane 2 is the positive control for the PCR where pSGRlucJFH1 plasmid DNA was used

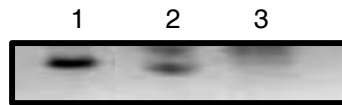

**PCR:** Strand specificity of reverse (Lane 2) and forward (Lane 3) HCV IRES primers was checked by RT-PCR of the in vitro transcribed pSGRlucJFH1 RNA for HCV IRES. Lane 1 is the positive control for the PCR where pSGRlucJFH1 plasmid DNA was used

Interplay between NS3 protease and human La protein---- by Ray and Das **Supplementary fig 11**

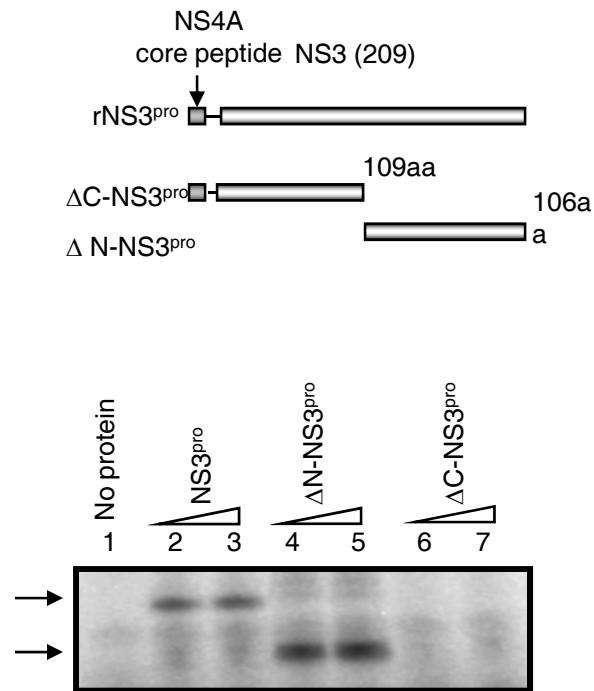

**UV crosslinking assay:** [ $\alpha^{32}\text{P}$ ] UTP labeled HCV IRES RNA was UV cross-linked with increasing concentrations of HCV NS3<sup>pro</sup> (lanes 2-3),  $\Delta\text{N-NS3}^{\text{pro}}$  (lanes 4-5) or  $\Delta\text{C-NS3}^{\text{pro}}$  (lanes 6-7) as indicated on the top of the lanes.

Interplay between NS3 protease and human La protein---- by Ray and Das **Supplementary fig 12**

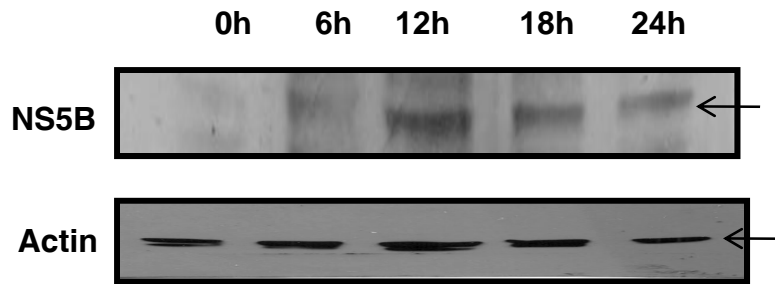

**Immunoblot:** Huh 7 cells were transiently co-transfected with HCV dicistronic replicon (Kato et al 2005) along with NS3<sup>pro</sup> encoding plasmid. Western blot analysis of the above reactions was carried out using anti-NS5B antibody to show levels of NS5B protein. Actin was used as internal control

Interplay between NS3 protease and human La protein---- by Ray and Das **Supplementary fig 13**

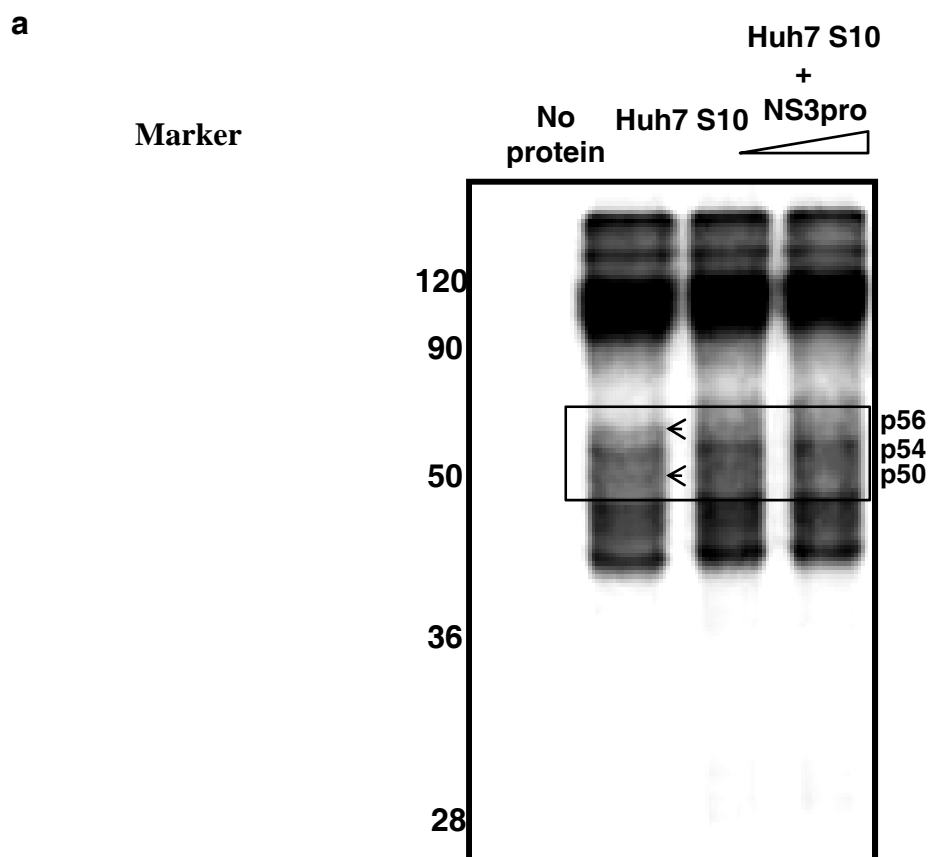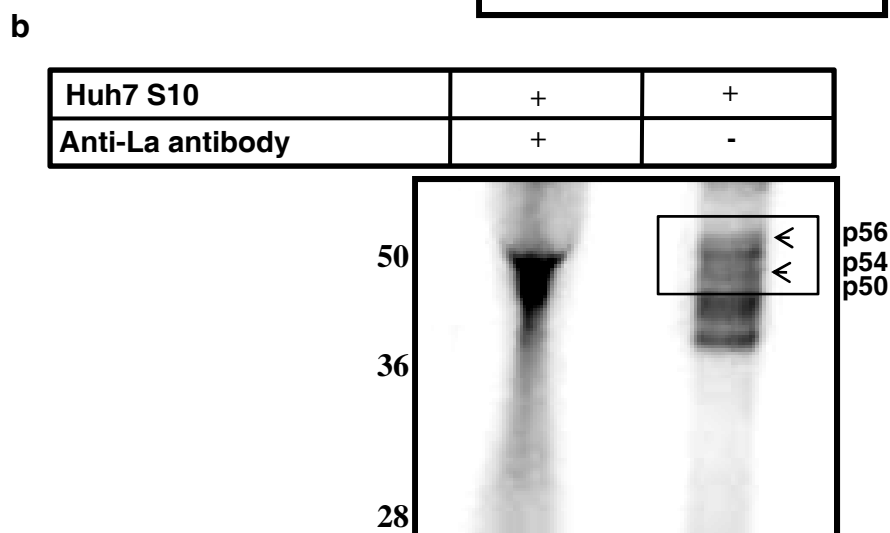

**UV crosslinking assay: Panel a:**  $\alpha$ [<sup>32</sup>P] UTP labeled HCV SLIV RNA was UV-crosslinked to Huh7 S10 protein in absence and presence of increasing concentration of NS3<sup>pro</sup>. The protein-nucleotide complex was resolved in 12% SDS-PAGE followed by phosphor imaging analysis. The position of different cellular proteins interacting with the SLIV RNA is indicated. **Panel b.** Similarly the RNA protein complex was immuno precipitated using anti La antibody and resolved in SDS 15%PAGE. The direct binding of HCV SLIV with Huh7S10 was run alongside. The numbers at the left of each panel represent the molecular masses of marker run alongside

Interplay between NS3 protease and human La protein---- by Ray and Das **Supplementary fig 14**

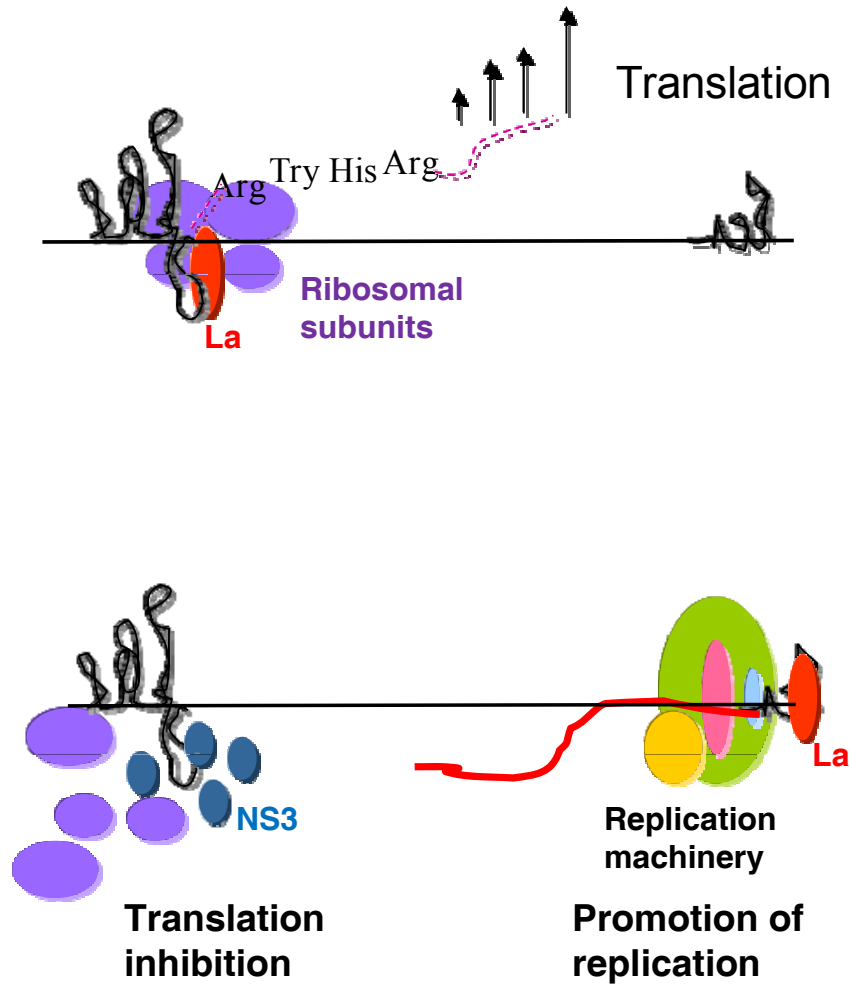

La protein stimulates HCV IRES mediated translation. NS3 binding competes out La from SLIV region. Dislodging of La leads to ribosome unloading and translation inhibition. La binds to 3'UTR, replication complex assembles and HCV RNA starts replicating.
